# Supplementary material
Source: HighWire-hosted journal article supplement (http://www.cmaj.ca/highwire/filestream/59100/field_highwire_adjunct_files/1/care-pilote-2-at.pdf)

## Appendix 2 (as supplied by the authors): Study flow diagram

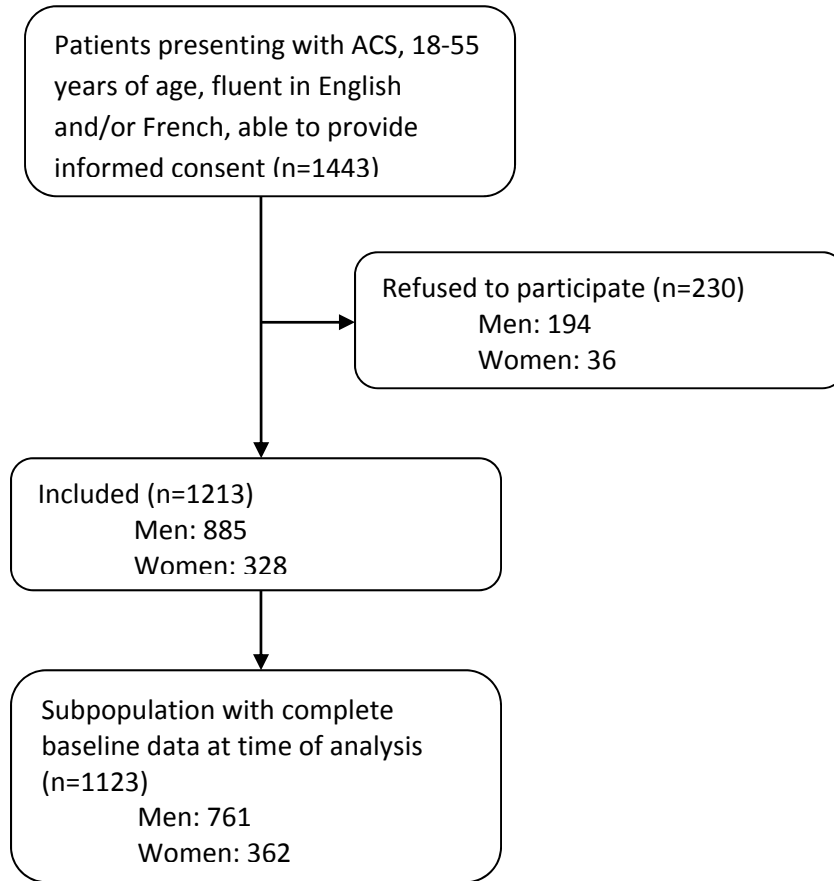

Supplement: care-pilote-2-at.pdf [file care-pilote-2-at.pdf]
